# Supplementary material
Source: MDPI journal article supplement (https://www.mdpi.com/2624-8549/5/3/137)
Supplement: s1 [file s1 › chemistry-2504600-supplementary-1.pdf]

# Thermal stability of enzyme-MOF composites under extremely high temperature

Shitong Cui<sup>1</sup>, Jun Ge<sup>1, 2, \*</sup>

1 Key Lab for Industrial Biocatalysis, Ministry of Education, Department of Chemical Engineering, Tsinghua University, Beijing 100084, China

2 Institute of Biopharmaceutical and Health Engineering, Tsinghua Shenzhen International Graduate School, Shenzhen 518055, Guangdong, China

## Supplementary material

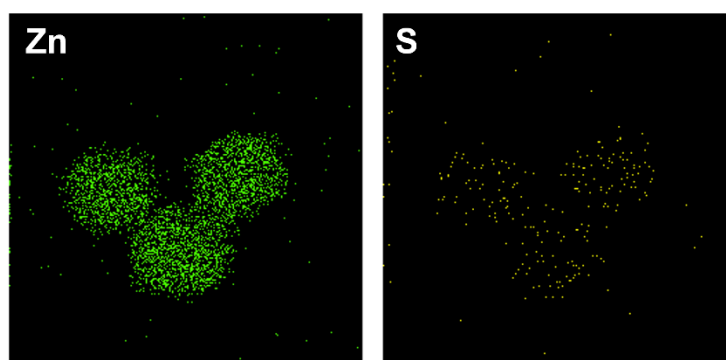

**Figure S1.** EDS mapping of elemental distribution of Zn and S within CALB-ZIF-8.

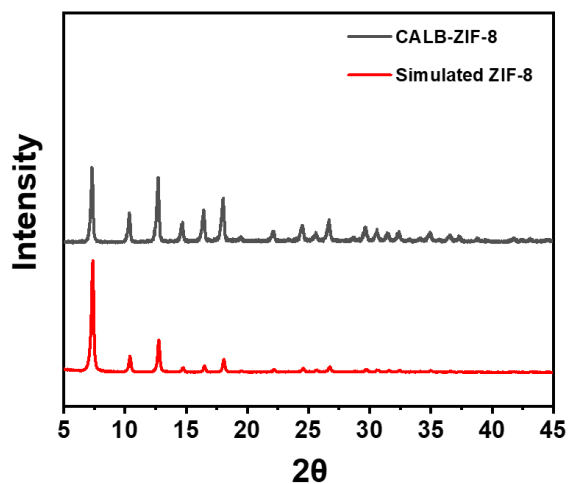

**Figure S2.** XRD patterns of CALB-ZIF-8 composites.

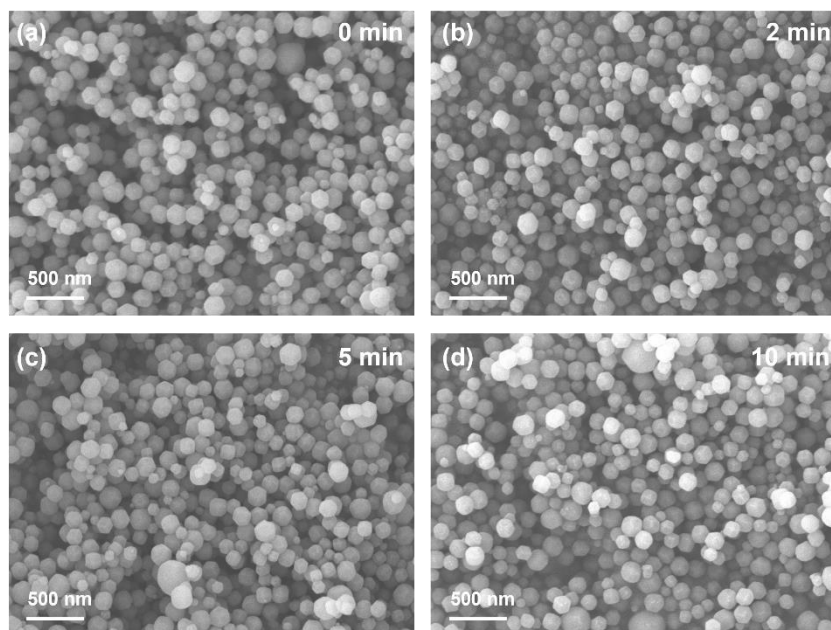

**Figure S3.** SEM images of CALB-ZIF-8 after heating for different time.

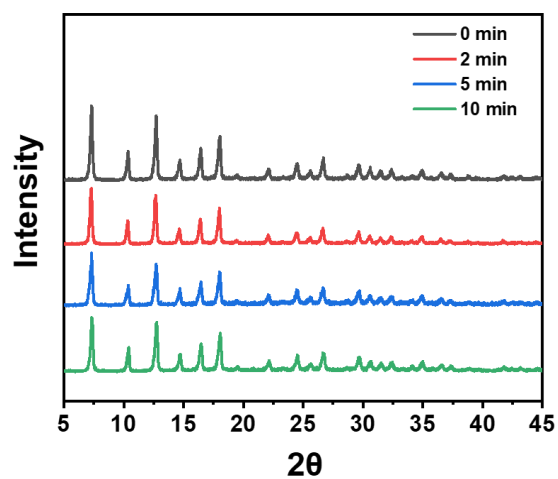

**Figure S4.** XRD patterns of CALB-ZIF-8 after heating for different time.

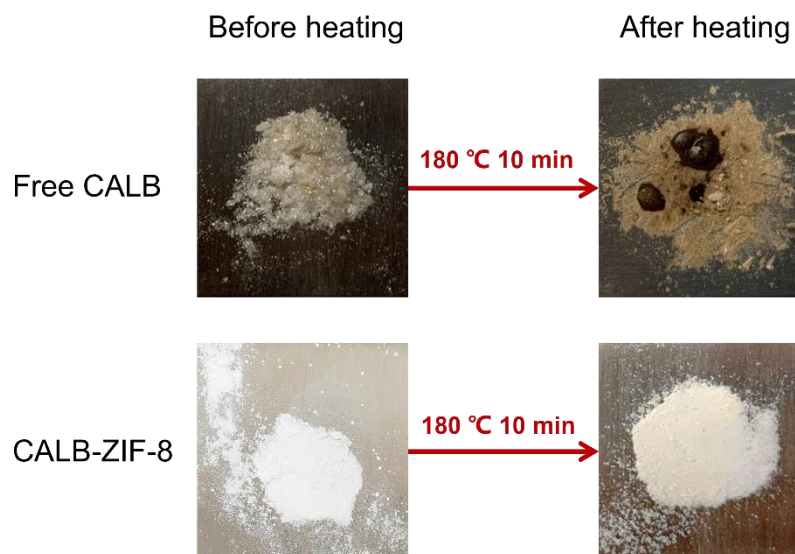

**Figure S5.** Pictures showing the free CALB and CALB-ZIF-8 before and after heating.

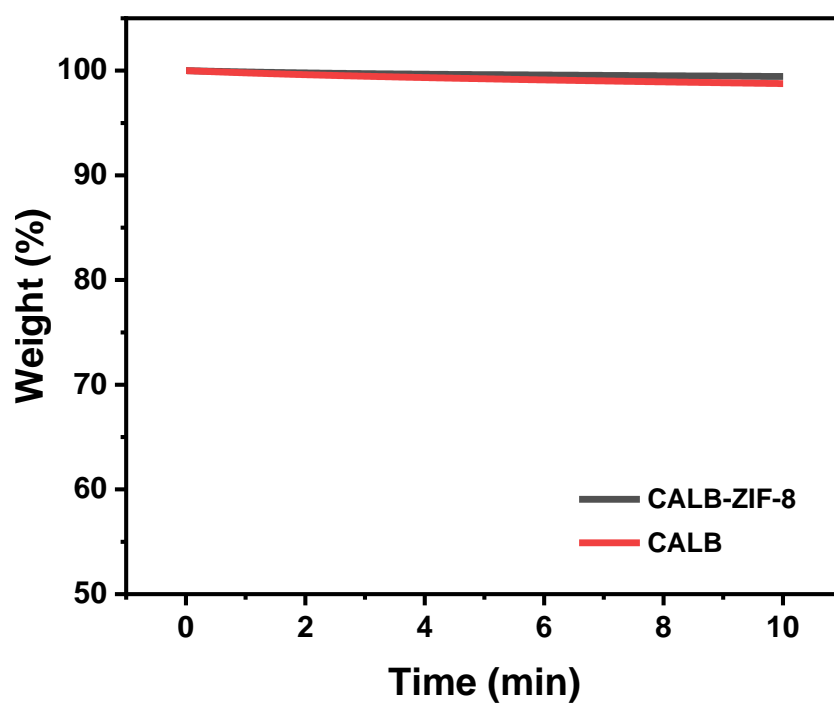

**Figure S6.** TGA data of free CALB and CALB-ZIF-8 when heating at 180 °C for 10 min.

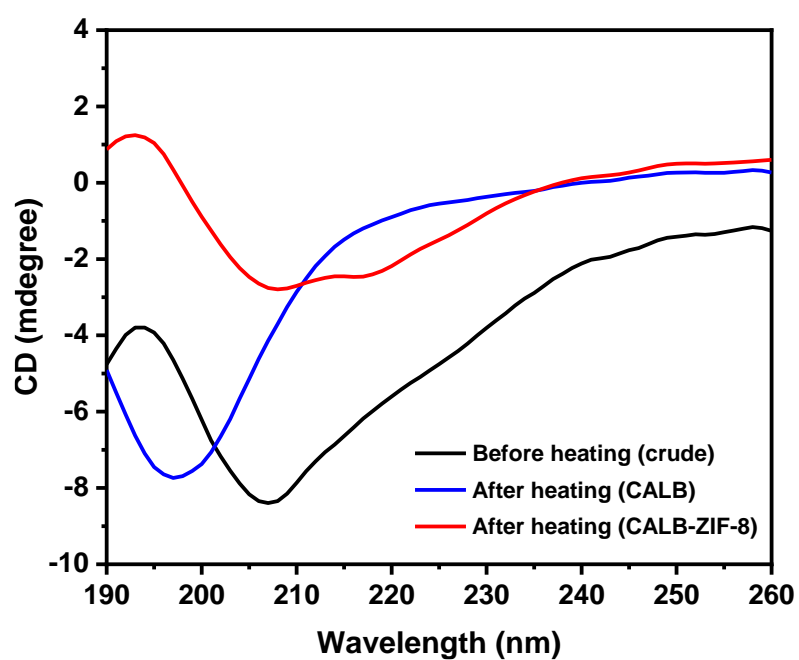

**Figure S7.** CD spectrograms of CALB before and after heating at 180 °C for 10 min, where “crude” refers to unheated CALB, “CALB” refers to free CALB after heating at 180 °C for 10 min and “CALB-ZIF-8” refers to CALB released from ZIF-8 after heating at 180 °C for 10 min.
